# Supplementary material
Source: MDPI journal article supplement (https://www.mdpi.com/2072-4292/8/7/580)
Supplement: s1 [file s1]

# Supplementary Materials: Evaluating Biosphere Model Estimates of the Start of the Vegetation Active Season in Boreal Forests by Satellite Observations

Kristin Böttcher, Tiina Markkanen, Tea Thum, Tuula Aalto, Mika Aurela, Christian H. Reick, Pasi Kolari, Ali N. Arslan and Jouni Pulliainen

**Table S1.** Proportions of land cover classes in Finland determined from CORINE land cover 2000 (Härmä et al. 2005).

| Land Cover Class                    | Proportion (%) <sup>1</sup> |
|-------------------------------------|-----------------------------|
| Evergreen needle-leaf forest        | 23.6                        |
| Deciduous broad-leaf forest         | 4.4                         |
| Mixed Forest                        | 15.8                        |
| Shrubs and/or herbaceous vegetation | 17.4                        |
| Inland waters                       | 8.5                         |
| Inland wetlands                     | 7.0                         |
| Arable land                         | 5.8                         |
| Urban fabric                        | 1.5                         |

<sup>1</sup> Only land cover classes with proportions higher than 1% were included here.

**Table S2.** Relationship between the mean of start of season from remote sensing and determined from JSBACH modelling for evergreen needle-leaf forest (ENF\_SOS<sub>mod</sub>) and deciduous broad-leaf forest (DBF\_SOS<sub>mod</sub>) for whole Finland and the three boreal sub-zones. The mean start of season was calculated for the period 2003 to 2010. All correlations were significant ( $p < 0.0001$ ). A positive bias means that the simulated date is late compared to observations.

| Forest Type | Boreal Zone | N   | R <sup>2</sup> | RMSE (d) | Bias (d) |
|-------------|-------------|-----|----------------|----------|----------|
| (a) ENF     | Finland     | 922 | 0.90           | 5.00     | -3.13    |
|             | Southern    | 326 | 0.81           | 4.10     | -2.47    |
|             | Middle      | 336 | 0.86           | 4.96     | -3.58    |
|             | Northern    | 251 | 0.25           | 5.76     | -4.33    |
| (b) DBF     | Finland     | 741 | 0.88           | 5.95     | 4.80     |
|             | Southern    | 246 | 0.58           | 7.18     | 6.89     |
|             | Middle      | 257 | 0.79           | 4.78     | 3.94     |
|             | Northern    | 239 | 0.48           | 4.91     | 3.18     |

**Table S3.** Relationship between start of season derived from remote sensing and from JSBACH simulations for evergreen needle-leaf forest (ENF) and deciduous broad-leaf forest (DBF) for different years in Finland. All correlations were significant ( $p < 0.0001$ ). A positive bias means that the simulated date is late compared to observations.

| Forest Type | Year | R <sup>2</sup> | RMSE (d) | Bias (d) |
|-------------|------|----------------|----------|----------|
| (a) ENF     |      |                |          |          |
| N = 958     | 2003 | 0.63           | 8.28     | -3.30    |
| N = 973     | 2004 | 0.65           | 10.14    | -5.28    |
| N = 880     | 2005 | 0.83           | 9.45     | -6.03    |
| N = 948     | 2006 | 0.63           | 6.77     | -5.90    |
| N = 904     | 2007 | 0.77           | 8.70     | -0.28    |
| N = 959     | 2008 | 0.77           | 8.11     | -1.15    |
| N = 973     | 2009 | 0.85           | 3.86     | -1.58    |
| N = 956     | 2010 | 0.89           | 6.91     | -2.33    |

Table S3. Cont.

| Forest Type    | Year | R <sup>2</sup> | RMSE (d) | Bias (d) |
|----------------|------|----------------|----------|----------|
| <b>(b) DBF</b> |      |                |          |          |
| N = 778        | 2003 | 0.43           | 8.05     | 5.02     |
| N = 740        | 2004 | 0.63           | 10.96    | 7.01     |
| N = 840        | 2005 | 0.86           | 6.32     | 4.24     |
| N = 705        | 2006 | 0.56           | 6.48     | 2.41     |
| N = 874        | 2007 | 0.84           | 9.52     | 7.52     |
| N = 824        | 2008 | 0.83           | 6.35     | 2.10     |
| N = 975        | 2009 | 0.80           | 7.36     | 5.67     |
| N = 1002       | 2010 | 0.29           | 10.12    | 5.16     |

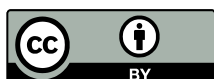

© 2016 by the authors; licensee MDPI, Basel, Switzerland. This article is an open access article distributed under the terms and conditions of the Creative Commons Attribution (CC-BY) license (<http://creativecommons.org/licenses/by/4.0/>).
